# Supplementary material
Source: Springer Nature journal article supplement (https://www.springermedizin.de/resource/supplementary/12985_2009_762_MOESM2_ESM.pdf/9608730)
Supplement: MOESM2 [file 9608730]

**(A)** AUG ORF2 AUG ORFX

Human astroviruses:

|          |        |     |     |     |     |     |     |     |     |     |     |     |     |     |     |     |     |     |     |     |         |
|----------|--------|-----|-----|-----|-----|-----|-----|-----|-----|-----|-----|-----|-----|-----|-----|-----|-----|-----|-----|-----|---------|
| Z25771   | AGUGUG | AUG | GCU | AGC | AAG | UCC | AAC | AAG | CAA | GUA | ACU | GUU | GAG | GUC | --- | --- | AGU | AAU | AAU | GGC | HAstV-1 |
| L13745   | AGUGUG | AUG | GCU | AGC | AAG | UCU | GAC | AAG | CAA | GUC | ACU | GUU | GAG | GUC | --- | --- | AAU | AAC | AAU | GGC | HAstV-2 |
| AF117209 | AGUGCG | AUG | GCU | AGC | AAG | UCU | GAU | AAG | CAA | GUC | ACU | GUU | GAG | GUC | AAA | AAU | AAC | AAC | AAU | GGC | HAstV-3 |
| DQ070852 | AGUGUG | AUG | GCU | AGC | AAG | UCU | GAC | AAG | CAA | GUC | ACU | GUU | GAG | GUC | --- | --- | AAU | AAC | AAU | GGC | HAstV-4 |
| DQ028633 | AGUGUG | AUG | GCU | AGC | AAG | CCC | AGC | AAA | CAG | GUA | ACU | GUU | GAG | GUC | --- | --- | --- | AAU | AAU | GGC | HAstV-5 |
| GQ495608 | AGUGUG | AUG | GCU | AGC | AAG | UCU | GAC | AAG | CAG | GUU | ACU | GUU | GAG | GUC | --- | --- | AAU | AAC | AAU | GGC | HAstV-6 |
| AF248738 | AGUGUG | AUG | GCU | AGU | AAG | UCU | GAU | AAG | CAA | GUU | ACU | GUU | GAG | GUC | --- | AAU | AAC | AAC | AAU | GGC | HAstV-7 |
| AF260508 | AGUGUG | AUG | GCU | AGC | AAG | UCU | GAC | AAG | CAA | GUC | ACU | GUU | GAG | GUC | --- | --- | AAU | AAC | AAU | GGC | HAstV-8 |

Related non-human astroviruses:

|          |        |     |     |     |     |     |     |     |     |     |     |     |     |     |     |     |     |     |     |     |            |
|----------|--------|-----|-----|-----|-----|-----|-----|-----|-----|-----|-----|-----|-----|-----|-----|-----|-----|-----|-----|-----|------------|
| EU650331 | AUUGUA | AUG | GCU | AGC | AAG | CCU | GGC | AAA | GAA | GUG | ACU | GUG | GAG | GUC | AAU | AAC | ACC | AAU | GGC | CGA | cheetah 1  |
| FJ890353 | AGUGUG | AUG | GCU | AGC | AAG | UCU | GAC | AAG | AAA | GUA | ACU | GUU | GAG | GUC | AAG | UCC | AAU | GGA | AAU | GGC | sea lion 3 |
| AB037272 | AAAGUA | AUG | GCU | AGC | AAG | UCU | GGC | AAG | GAU | GUC | ACU | GUC | AAG | GUC | GAA | AAC | ACC | AAC | GGC | CGU | porcine    |
| FM213330 | AUUGCG | AUG | GCU | AGC | AAG | CCA | GGC | AAA | GAU | GUC | ACC | GUU | GAG | GUU | AAA | ACC | UCC | GGA | ACA | AAA | dog faeces |
| FJ890355 | UUUGCA | AUG | GCU | AAC | GGC | CGU | AGC | AAA | GAU | GUU | AGC | GUU | GAG | GUU | AAA | GCC | UCC | GGC | UCA | CAG | dolphin 1  |
| FJ890352 | CGUGCG | AUG | GCU | AGU | GCU | UCU | GGC | AAA | AAU | GUC | ACU | GUC | GAG | GUC | AAG | AAC | ACC | GGA | UCU | CGC | sea lion 2 |

**(B)** Z25771 (nt 4419..4754) Human astrovirus HAstV-1

MAAAGVNQGP VHNLGAETNQ SRSQSIQETE PGDSPDATNV NLLNVSVTLS ISNSGNRVSQ DQNLQYVREQ QQPLGQSGQT  
PVAPLRLRRV FSSTLSSLRT LLEALSLALC RR
